# Supplementary material for: Determinants of acute mortality of Hippodamia convergens (Coleoptera: Coccinellidae) to ultra-low volume permethrin used for mosquito management
Source: PeerJ. 2016 Jun 23;4:e2167. doi: 10.7717/peerj.2167 (PMC4924137; doi:10.7717/peerj.2167)
Supplement: Supplemental Information 1 [file peerj-04-2167-s001.xlsx]

## Sheet: Sheet1
REP	DATE	FORMULATION	RATE	DISTANCE	POSITION	CAGE	WINDSPEED	TEMP	DEAD	ALIVE	SUM
1	2011-08-17	PERMN	0.25	40	UPPER	UC	13.83	28.2937	25	0	25
1	2011-08-17	PERMN	0.25	40	LOWER	UC	13.83	28.2937	0	25	25
1	2011-08-17	PERMN	0.25	60	UPPER	UC	13.83	28.2937	21	0	21
1	2011-08-17	PERMN	0.25	60	LOWER	UC	13.83	28.2937	0	25	25
1	2011-08-17	PERMN	0.25	100	UPPER	UC	13.83	28.2937	24	0	24
1	2011-08-17	PERMN	0.25	100	LOWER	UC	13.83	28.2937	0	24	24
2	2011-08-22	PERMN	0.5	40	UPPER	UC	28.72	33.5199	4	21	25
2	2011-08-22	PERMN	0.5	40	LOWER	UC	28.72	33.5199	0	23	23
2	2011-08-22	PERMN	0.5	60	UPPER	UC	28.72	33.5199	19	3	22
2	2011-08-22	PERMN	0.5	60	LOWER	UC	28.72	33.5199	0	24	24
2	2011-08-22	PERMN	0.5	100	UPPER	UC	28.72	33.5199	2	23	25
2	2011-08-22	PERMN	0.5	100	LOWER	UC	28.72	33.5199	1	25	26
3	2011-08-22	AQUA	0.5	40	UPPER	UC	24.39	33.1402	27	0	27
3	2011-08-22	AQUA	0.5	40	LOWER	UC	24.39	33.1402	0	25	25
3	2011-08-22	AQUA	0.5	60	UPPER	UC	24.39	33.1402	23	0	23
3	2011-08-22	AQUA	0.5	60	LOWER	UC	24.39	33.1402	0	30	30
3	2011-08-22	AQUA	0.5	100	UPPER	UC	24.39	33.1402	27	0	27
3	2011-08-22	AQUA	0.5	100	LOWER	UC	24.39	33.1402	0	27	27
4	2011-08-22	AQUA	0.5	40	UPPER	UC	17.56	32.6407	25	0	25
4	2011-08-22	AQUA	0.5	40	LOWER	UC	17.56	32.6407	3	21	24
4	2011-08-22	AQUA	0.5	60	UPPER	UC	17.56	32.6407	25	0	25
4	2011-08-22	AQUA	0.5	60	LOWER	UC	17.56	32.6407	0	29	29
4	2011-08-22	AQUA	0.5	100	UPPER	UC	17.56	32.6407	24	0	24
4	2011-08-22	AQUA	0.5	100	LOWER	UC	17.56	32.6407	0	25	25
5	2011-08-23	PERMN	0.25	40	UPPER	UC	19.02	31.7775	18	6	24
5	2011-08-23	PERMN	0.25	40	LOWER	UC	19.02	31.7775	0	21	21
5	2011-08-23	PERMN	0.25	60	UPPER	UC	19.02	31.7775	19	6	25
5	2011-08-23	PERMN	0.25	60	LOWER	UC	19.02	31.7775	0	24	24
5	2011-08-23	PERMN	0.25	100	UPPER	UC	19.02	31.7775	19	5	24
5	2011-08-23	PERMN	0.25	100	LOWER	UC	19.02	31.7775	3	15	18
6	2011-08-23	AQUA	0.25	40	UPPER	UC	14.69	30.9758	25	0	25
6	2011-08-23	AQUA	0.25	40	LOWER	UC	14.69	30.9758	0	24	24
6	2011-08-23	AQUA	0.25	60	UPPER	UC	14.69	30.9758	25	0	25
6	2011-08-23	AQUA	0.25	60	LOWER	UC	14.69	30.9758	2	19	21
6	2011-08-23	AQUA	0.25	100	UPPER	UC	14.69	30.9758	3	23	26
6	2011-08-23	AQUA	0.25	100	LOWER	UC	14.69	30.9758	1	24	25
7	2011-08-23	AQUA	0.5	40	UPPER	UC	16.62	30.5378	25	0	25
7	2011-08-23	AQUA	0.5	40	LOWER	UC	16.62	30.5378	0	25	25
7	2011-08-23	AQUA	0.5	60	UPPER	UC	16.62	30.5378	25	0	25
7	2011-08-23	AQUA	0.5	60	LOWER	UC	16.62	30.5378	0	25	25
7	2011-08-23	AQUA	0.5	100	UPPER	UC	16.62	30.5378	25	0	25
7	2011-08-23	AQUA	0.5	100	LOWER	UC	16.62	30.5378	0	25	25
8	2011-08-23	PERMN	0.5	40	UPPER	UC	15.48	30.081	22	0	22
8	2011-08-23	PERMN	0.5	40	LOWER	UC	15.48	30.081	8	17	25
8	2011-08-23	PERMN	0.5	60	UPPER	UC	15.48	30.081	21	0	21
8	2011-08-23	PERMN	0.5	60	LOWER	UC	15.48	30.081	2	24	26
8	2011-08-23	PERMN	0.5	100	UPPER	UC	15.48	30.081	17	8	25
8	2011-08-23	PERMN	0.5	100	LOWER	UC	15.48	30.081	0	22	22
9	2011-08-30	AQUA	0.25	40	UPPER	UC	16.5	29.3689	26	0	26
9	2011-08-30	AQUA	0.25	40	LOWER	UC	16.5	29.3689	1	19	20
9	2011-08-30	AQUA	0.25	60	UPPER	UC	16.5	29.3689	23	0	23
9	2011-08-30	AQUA	0.25	60	LOWER	UC	16.5	29.3689	0	25	25
9	2011-08-30	AQUA	0.25	100	UPPER	UC	16.5	29.3689	23	2	25
9	2011-08-30	AQUA	0.25	100	LOWER	UC	16.5	29.3689	0	25	25
