# Supplementary material for: Determinants of acute mortality of Hippodamia convergens (Coleoptera: Coccinellidae) to ultra-low volume permethrin used for mosquito management
Source: PeerJ. 2016 Jun 23;4:e2167. doi: 10.7717/peerj.2167 (PMC4924137; doi:10.7717/peerj.2167)
Supplement: Supplemental Information 2 [file peerj-04-2167-s002.xlsx]

## Sheet: CB_DATA_
Crystal Ball Data
Workbook Variables	Last Var Column	0
Name:
Value:
Worksheet Data	Last Data Column Used
	3
Sheet Ref
#REF!	#REF!	#REF!
Sheet Guid
09bbf6a0-ee82-4ee6-8993-9c84a9a21bf1	ca8902ef-67dd-4e2a-9109-f432ea7b9ae5	8e93c10c-4d35-4768-b5ed-d42717cfb183
Deleted sheet count
Last row used
28	26	26
Data blocks
CB_Block_0
㜸〱敤㕣㕢㙣ㅣ搷㜹摥㌳摣㕤敥㉣㐹㤱ㄶ攵㡢ㅣ挷㘶攲㌸㜶㑣㤵ㄶ㈵㉢㡥搳㉡㉡㉦搶挵愱㐴㕡㑢挹〹㔲㘳㌵摣㍤㐳㡥戵㌳㐳捦捣㔲愲㙢挰㠶攳挴つㄲ㈷㠰摢ㅡ㜵攲戸㠱㔱〴〸㤰㌶改㑢㥡戴㝥〹㄰愰㐵攰〰㜹㐸ㅥ〲昴挱㌵㡡ㄶ㘸㡣㐰㐰㕦晣㄰㈰晤扥㌳㌳扢㌳扢摣㈱扤戶ㄳ扡攰㤱昷攷㤹㜳㥢㜳捥㝦㍤晦㝦挶㌹㤱换攵㝥㠷挴扦㑣㜹㘶㙥愹㙣晡㠱戴愷收摣㐶㐳搶〲换㜵晣愹ㄹ捦㌳㌶ㄷ㉣㍦ㄸ㐰㠳㘲搵㐲扤㕦愸晡搶攳戲㔴摤㤰㥥㡦㐶㠵㕣慥㔴搲㌵搴㜳㄰晥挶攲〷㥤扤㠶昳〰换㜳戳㡢㉢㡦㘲搴㑡攰㝡昲搰挴挵戰敦昱改改愹改愹愳昷ㅥ晤昸搴攱㐳ㄳ㜳捤㐶搰昴攴㜱㐷㌶〳捦㘸ㅣ㥡㔸㙡慥㌴慣摡愷攵收戲㝢㔹㍡挷攵捡攱愳㉢挶扤㥦㤸扥昷搸㌱昳晥晢㍦㌱㡣㔷攷捥捤捤㉥㜹搲昴摦愵㌱ぢ㥣昲扤昳戲㘶㜱㙤㔲㝡㤶戳㍡㌵㌷㡢晦ㄲ昳挷搳㝤㔳㤵㌵㈹〳扥㕡㝡搲愹㐹㕦㐷挷㈱㝢挶昷㥢昶㍡㌷㑦户㑦㘲愹㌵挳てち昶㥣㙣㌴㜴㍢ㅥ戵㘴㉦㘲敦ㅡ挶收戰㕤㤱㡥㙦〵搶㠶ㄵ㙣ㄶ敤㘵っ㔴ㅦ戱㉦昸昲扣攱慣捡㜳㠶㉤ぢ昶愹愶㔵捦㠷…
Decisioneering:7.0.0.0

## Sheet: All 2015 Data
REP	FORMULATION	DISTANCE	POSITION	CAGE	WIND SPEED	RH	TEMP	NUMBERDROPS	DROPSPERMM	VMD	DEAD	ALIVE	SUM	PROPMORT
1	AQUA	20	UPPER	UC	4.02	35	27.22	102	1.115	18.26	22	0	22	1
1	AQUA	20	UPPER	CC	4.02	35	27.22	102	1.115	18.26	1	24	25	0.04
1	AQUA	20	LOWER	UC	4.02	35	27.22	84	1.14	19.17	5	17	22	0.227273
1	AQUA	20	LOWER	CC	4.02	35	27.22	84	1.14	19.17	0	26	26	0
1	AQUA	40	UPPER	UC	4.02	35	27.22	86	0.903	14.77	21	3	24	0.875
1	AQUA	40	UPPER	CC	4.02	35	27.22	86	0.903	14.77	0	27	27	0
1	AQUA	40	LOWER	UC	4.02	35	27.22	100	0.875	16.97	5	19	24	0.208333
1	AQUA	40	LOWER	CC	4.02	35	27.22	100	0.875	16.97	0	26	26	0
3	AQUA	20	UPPER	UC	5.63	32	30.56	100	1.124	15.99	19	7	26	0.730769
3	AQUA	20	UPPER	CC	5.63	32	30.56	100	1.124	15.99	0	24	24	0
3	AQUA	20	LOWER	UC	5.63	32	30.56	101	1.325	15.01	1	25	26	0.0384615
3	AQUA	20	LOWER	CC	5.63	32	30.56	101	1.325	15.01	0	22	22	0
3	AQUA	40	UPPER	UC	5.63	32	30.56	58	0.895	15.94	10	15	25	0.4
3	AQUA	40	UPPER	CC	5.63	32	30.56	58	0.895	15.94	0	26	26	0
3	AQUA	40	LOWER	UC	5.63	32	30.56	102	1.07	17.54	1	25	26	0.0384615
3	AQUA	40	LOWER	CC	5.63	32	30.56	102	1.07	17.54	0	26	26	0
4	AQUA	20	UPPER	UC	6.4	30	30	101	1.074	15.55	26	0	26	1
4	AQUA	20	UPPER	CC	6.4	30	30	101	1.074	15.55	2	18	20	0.1
4	AQUA	20	LOWER	UC	6.4	30	30	100	1.036	16.41	25	0	25	1
4	AQUA	20	LOWER	CC	6.4	30	30	100	1.036	16.41	0	25	25	0
4	AQUA	40	UPPER	UC	6.4	30	30	100	1.109	14.88	26	0	26	1
4	AQUA	40	UPPER	CC	6.4	30	30	100	1.109	14.88	2	13	15	0.133333
4	AQUA	40	LOWER	UC	6.4	30	30	100	1.05	16.25	6	16	22	0.272727
4	AQUA	40	LOWER	CC	6.4	30	30	100	1.05	16.25	2	24	26	0.0769231
5	PERMN	20	UPPER	UC	8.85	38	26.67	23	0.862	22.72	26	0	26	1
5	PERMN	20	UPPER	CC	8.85	38	26.67	23	0.862	22.72	2	23	25	0.08
5	PERMN	20	LOWER	UC	8.85	38	26.67	5	0.656	100.3	26	0	26	1
5	PERMN	20	LOWER	CC	8.85	38	26.67	5	0.656	100.3	2	24	26	0.0769231
5	PERMN	40	UPPER	UC	8.85	38	26.67	100	1.211	22.59	25	0	25	1
5	PERMN	40	UPPER	CC	8.85	38	26.67	100	1.211	22.59	19	7	26	0.730769
5	PERMN	40	LOWER	UC	8.85	38	26.67	92	1.114	23.12	21	2	23	0.913043
5	PERMN	40	LOWER	CC	8.85	38	26.67	92	1.114	23.12	2	23	25	0.08
6	PERMN	20	UPPER	UC	12.07	38	25.56	100	1.543	25.31	20	0	20	1
6	PERMN	20	UPPER	CC	12.07	38	25.56	100	1.543	25.31	3	23	26	0.115385
6	PERMN	20	LOWER	UC	12.07	38	25.56	69	1.086	23.48	21	0	21	1
6	PERMN	20	LOWER	CC	12.07	38	25.56	69	1.086	23.48	0	23	23	0
6	PERMN	40	UPPER	UC	12.07	38	25.56	88	0.962	21.91	26	0	26	1
6	PERMN	40	UPPER	CC	12.07	38	25.56	88	0.962	21.91	0	24	24	0
6	PERMN	40	LOWER	UC	12.07	38	25.56	65	0.984	24.69	22	0	22	1
6	PERMN	40	LOWER	CC	12.07	38	25.56	65	0.984	24.69	1	25	26	0.0384615
7	PERMN	20	UPPER	UC	4.82	31	31.11	107	4.945	25.37	27	0	27	1
7	PERMN	20	UPPER	CC	4.82	31	31.11	107	4.945	25.37	0	24	24	0
7	PERMN	20	LOWER	UC	4.82	31	31.11	103	3.118	22.41	22	6	28	0.785714
7	PERMN	20	LOWER	CC	4.82	31	31.11	103	3.118	22.41	0	27	27	0
7	PERMN	40	UPPER	UC	4.82	31	31.11	101	1.849	21.39	26	0	26	1
7	PERMN	40	UPPER	CC	4.82	31	31.11	101	1.849	21.39	0	25	25	0
7	PERMN	40	LOWER	UC	4.82	31	31.11	100	1.514	21.63	3	23	26	0.115385
7	PERMN	40	LOWER	CC	4.82	31	31.11	100	1.514	21.63	0	24	24	0
8	PERMN	20	UPPER	UC	4.02	31	31.11	101	2.741	24.96	24	0	24	1
8	PERMN	20	UPPER	CC	4.02	31	31.11	101	2.741	24.96	0	25	25	0
8	PERMN	20	LOWER	UC	4.02	31	31.11	110	4.123	26.2	1	25	26	0.0384615
8	PERMN	20	LOWER	CC	4.02	31	31.11	110	4.123	26.2	0	0	0	#DIV/0!
8	PERMN	40	UPPER	UC	4.02	31	31.11	100	1.675	21.17	17	9	26	0.653846
8	PERMN	40	UPPER	CC	4.02	31	31.11	100	1.675	21.17	0	25	25	0
8	PERMN	40	LOWER	UC	4.02	31	31.11	100	1.406	25.23	0	25	25	0
8	PERMN	40	LOWER	CC	4.02	31	31.11	100	1.406	25.23	0	26	26	0
9	AQUA	20	UPPER	UC	12.87	49.1	20.61	104	6.297	27.12	9	14	23	0.391304
9	AQUA	20	UPPER	CC	12.87	49.1	20.61	104	6.297	27.12	0	20	20	0
9	AQUA	20	LOWER	UC	12.87	49.1	20.61	101	7.95	27.97	2	24	26	0.0769231
9	AQUA	20	LOWER	CC	12.87	49.1	20.61	101	7.95	27.97	1	25	26	0.0384615
9	AQUA	40	UPPER	UC	12.87	49.1	20.61	101	1.472	17.64	26	0	26	1
9	AQUA	40	UPPER	CC	12.87	49.1	20.61	101	1.472	17.64	7	19	26	0.269231
9	AQUA	40	LOWER	UC	12.87	49.1	20.61	100	1.406	17.85	25	0	25	1
9	AQUA	40	LOWER	CC	12.87	49.1	20.61	100	1.406	17.85	1	24	25	0.04
10	AQUA	20	UPPER	UC	12.87	49.1	20.61	103	4.769	25.56	26	0	26	1
10	AQUA	20	UPPER	CC	12.87	49.1	20.61	103	4.769	25.56	1	25	26	0.0384615
10	AQUA	20	LOWER	UC	12.87	49.1	20.61	102	2.867	26.81	24	1	25	0.96
10	AQUA	20	LOWER	CC	12.87	49.1	20.61	102	2.867	26.81	2	23	25	0.08
10	AQUA	40	UPPER	UC	12.87	49.1	20.61	101	1.939	24.67	24	0	24	1
10	AQUA	40	UPPER	CC	12.87	49.1	20.61	101	1.939	24.67	1	21	22	0.0454545
10	AQUA	40	LOWER	UC	12.87	49.1	20.61	103	1.689	28.32	25	0	25	1
10	AQUA	40	LOWER	CC	12.87	49.1	20.61	103	1.689	28.32	2	24	26	0.0769231
11	PERMN	20	UPPER	UC	7.4	46	22.22	100	1.485	25.86	23	1	24	0.958333
11	PERMN	20	UPPER	CC	7.4	46	22.22	100	1.485	25.86	0	25	25	0
11	PERMN	20	LOWER	UC	7.4	46	22.22	100	1.158	21.72	0	25	25	0
11	PERMN	20	LOWER	CC	7.4	46	22.22	100	1.158	21.72	0	24	24	0
11	PERMN	40	UPPER	UC	7.4	46	22.22	102	1.181	20.92	4	19	23	0.173913
11	PERMN	40	UPPER	CC	7.4	46	22.22	102	1.181	20.92	0	25	25	0
11	PERMN	40	LOWER	UC	7.4	46	22.22	14	0.787	22.94	0	25	25	0
11	PERMN	40	LOWER	CC	7.4	46	22.22	14	0.787	22.94	0	26	26	0
12	PERMN	20	UPPER	UC	6.12	46	22.22	108	3.149	27.09	27	0	27	1
12	PERMN	20	UPPER	CC	6.12	46	22.22	108	3.149	27.09	0	25	25	0
12	PERMN	20	LOWER	UC	6.12	46	22.22	101	1.262	27.9	1	24	25	0.04
12	PERMN	20	LOWER	CC	6.12	46	22.22	101	1.262	27.9	1	23	24	0.0416667
12	PERMN	40	UPPER	UC	6.12	46	22.22	101	2.65	31.99	7	18	25	0.28
12	PERMN	40	UPPER	CC	6.12	46	22.22	101	2.65	31.99	0	25	25	0
12	PERMN	40	LOWER	UC	6.12	46	22.22	97	1.909	28.9	1	24	25	0.04
12	PERMN	40	LOWER	CC	6.12	46	22.22	97	1.909	28.9	1	24	25	0.04

## Sheet: Uncovered Cages and droplets
REP	FORMULATION	DISTANCE	POSITION	CAGE	WIND SPEED	RH	TEMP	NUMBERDROPS	DROPSPERMM	VMD	DEAD	ALIVE	SUM	PROPMORT
1	AQUA	20	UPPER	UC	4.02	35	27.22	102	1.115	18.26	22	0	22	1
1	AQUA	20	LOWER	UC	4.02	35	27.22	84	1.14	19.17	5	17	22	0.227273
1	AQUA	40	UPPER	UC	4.02	35	27.22	86	0.903	14.77	21	3	24	0.875
1	AQUA	40	LOWER	UC	4.02	35	27.22	100	0.875	16.97	5	19	24	0.208333
3	AQUA	20	UPPER	UC	5.63	32	30.56	100	1.124	15.99	19	7	26	0.730769
3	AQUA	20	LOWER	UC	5.63	32	30.56	101	1.325	15.01	1	25	26	0.0384615
3	AQUA	40	UPPER	UC	5.63	32	30.56	58	0.895	15.94	10	15	25	0.4
3	AQUA	40	LOWER	UC	5.63	32	30.56	102	1.07	17.54	1	25	26	0.0384615
4	AQUA	20	UPPER	UC	6.4	30	30	101	1.074	15.55	26	0	26	1
4	AQUA	20	LOWER	UC	6.4	30	30	100	1.036	16.41	25	0	25	1
4	AQUA	40	UPPER	UC	6.4	30	30	100	1.109	14.88	26	0	26	1
4	AQUA	40	LOWER	UC	6.4	30	30	100	1.05	16.25	6	16	22	0.272727
5	PERMN	20	UPPER	UC	8.85	38	26.67	23	0.862	22.72	26	0	26	1
5	PERMN	20	LOWER	UC	8.85	38	26.67	5	0.656	100.3	26	0	26	1
5	PERMN	40	UPPER	UC	8.85	38	26.67	100	1.211	22.59	25	0	25	1
5	PERMN	40	LOWER	UC	8.85	38	26.67	92	1.114	23.12	21	2	23	0.913043
6	PERMN	20	UPPER	UC	12.07	38	25.56	100	1.543	25.31	20	0	20	1
6	PERMN	20	LOWER	UC	12.07	38	25.56	69	1.086	23.48	21	0	21	1
6	PERMN	40	UPPER	UC	12.07	38	25.56	88	0.962	21.91	26	0	26	1
6	PERMN	40	LOWER	UC	12.07	38	25.56	65	0.984	24.69	22	0	22	1
7	PERMN	20	UPPER	UC	4.82	31	31.11	107	4.945	25.37	27	0	27	1
7	PERMN	20	LOWER	UC	4.82	31	31.11	103	3.118	22.41	22	6	28	0.785714
7	PERMN	40	UPPER	UC	4.82	31	31.11	101	1.849	21.39	26	0	26	1
7	PERMN	40	LOWER	UC	4.82	31	31.11	100	1.514	21.63	3	23	26	0.115385
8	PERMN	20	UPPER	UC	4.02	31	31.11	101	2.741	24.96	24	0	24	1
8	PERMN	20	LOWER	UC	4.02	31	31.11	110	4.123	26.2	1	25	26	0.0384615
8	PERMN	40	UPPER	UC	4.02	31	31.11	100	1.675	21.17	17	9	26	0.653846
8	PERMN	40	LOWER	UC	4.02	31	31.11	100	1.406	25.23	0	25	25	0
9	AQUA	20	UPPER	UC	12.87	49.1	20.61	104	6.297	27.12	9	14	23	0.391304
9	AQUA	20	LOWER	UC	12.87	49.1	20.61	101	7.95	27.97	2	24	26	0.0769231
9	AQUA	40	UPPER	UC	12.87	49.1	20.61	101	1.472	17.64	26	0	26	1
9	AQUA	40	LOWER	UC	12.87	49.1	20.61	100	1.406	17.85	25	0	25	1
10	AQUA	20	UPPER	UC	12.87	49.1	20.61	103	4.769	25.56	26	0	26	1
10	AQUA	20	LOWER	UC	12.87	49.1	20.61	102	2.867	26.81	24	1	25	0.96
10	AQUA	40	UPPER	UC	12.87	49.1	20.61	101	1.939	24.67	24	0	24	1
10	AQUA	40	LOWER	UC	12.87	49.1	20.61	103	1.689	28.32	25	0	25	1
11	PERMN	20	UPPER	UC	7.4	46	22.22	100	1.485	25.86	23	1	24	0.958333
11	PERMN	20	LOWER	UC	7.4	46	22.22	100	1.158	21.72	0	25	25	0
11	PERMN	40	UPPER	UC	7.4	46	22.22	102	1.181	20.92	4	19	23	0.173913
11	PERMN	40	LOWER	UC	7.4	46	22.22	14	0.787	22.94	0	25	25	0
12	PERMN	20	UPPER	UC	6.12	46	22.22	108	3.149	27.09	27	0	27	1
12	PERMN	20	LOWER	UC	6.12	46	22.22	101	1.262	27.9	1	24	25	0.04
12	PERMN	40	UPPER	UC	6.12	46	22.22	101	2.65	31.99	7	18	25	0.28
12	PERMN	40	LOWER	UC	6.12	46	22.22	97	1.909	28.9	1	24	25	0.04

## Sheet: Sheet2
REP	FORMULATION	DISTANCE	POSITION	DROPSPERMM
1	AQUA	20	UPPER	1.115
1	AQUA	20	LOWER	1.14
1	AQUA	40	UPPER	0.903
1	AQUA	40	LOWER	0.875
3	AQUA	20	UPPER	1.124
3	AQUA	20	LOWER	1.325
3	AQUA	40	UPPER	0.895
3	AQUA	40	LOWER	1.07
4	AQUA	20	UPPER	1.074
4	AQUA	20	LOWER	1.036
4	AQUA	40	UPPER	1.109
4	AQUA	40	LOWER	1.05
5	PERMN	20	UPPER	0.862
5	PERMN	20	LOWER	0.656
5	PERMN	40	UPPER	1.211
5	PERMN	40	LOWER	1.114
6	PERMN	20	UPPER	1.543
6	PERMN	20	LOWER	1.086
6	PERMN	40	UPPER	0.962
6	PERMN	40	LOWER	0.984
7	PERMN	20	UPPER	4.945
7	PERMN	20	LOWER	3.118
7	PERMN	40	UPPER	1.849
7	PERMN	40	LOWER	1.514
8	PERMN	20	UPPER	2.741
8	PERMN	20	LOWER	4.123
8	PERMN	40	UPPER	1.675
8	PERMN	40	LOWER	1.406
9	AQUA	20	UPPER	6.297
9	AQUA	20	LOWER	7.95
9	AQUA	40	UPPER	1.472
9	AQUA	40	LOWER	1.406
10	AQUA	20	UPPER	4.769
10	AQUA	20	LOWER	2.867
10	AQUA	40	UPPER	1.939
10	AQUA	40	LOWER	1.689
11	PERMN	20	UPPER	1.485
11	PERMN	20	LOWER	1.158
11	PERMN	40	UPPER	1.181
11	PERMN	40	LOWER	0.787
12	PERMN	20	UPPER	3.149
12	PERMN	20	LOWER	1.262
12	PERMN	40	UPPER	2.65
12	PERMN	40	LOWER	1.909

## Sheet: Without Covered Cages
REP	FORMULATION	DISTANCE	POSITION	CAGE	WIND SPEED	RH	TEMP	DEAD	ALIVE	SUM	PROPMORT
1	AQUA	20	UPPER	UC	4.02	35	27.22	22	0	22	1
1	AQUA	20	LOWER	UC	4.02	35	27.22	5	17	22	0.227273
1	AQUA	40	UPPER	UC	4.02	35	27.22	21	3	24	0.875
1	AQUA	40	LOWER	UC	4.02	35	27.22	5	19	24	0.208333
3	AQUA	20	UPPER	UC	5.63	32	30.56	19	7	26	0.730769
3	AQUA	20	LOWER	UC	5.63	32	30.56	1	25	26	0.0384615
3	AQUA	40	UPPER	UC	5.63	32	30.56	10	15	25	0.4
3	AQUA	40	LOWER	UC	5.63	32	30.56	1	25	26	0.0384615
4	AQUA	20	UPPER	UC	6.4	30	30	26	0	26	1
4	AQUA	20	LOWER	UC	6.4	30	30	25	0	25	1
4	AQUA	40	UPPER	UC	6.4	30	30	26	0	26	1
4	AQUA	40	LOWER	UC	6.4	30	30	6	16	22	0.272727
5	PERMN	20	UPPER	UC	8.85	38	26.67	26	0	26	1
5	PERMN	20	LOWER	UC	8.85	38	26.67	26	0	26	1
5	PERMN	40	UPPER	UC	8.85	38	26.67	25	0	25	1
5	PERMN	40	LOWER	UC	8.85	38	26.67	21	2	23	0.913043
6	PERMN	20	UPPER	UC	12.07	38	25.56	20	0	20	1
6	PERMN	20	LOWER	UC	12.07	38	25.56	21	0	21	1
6	PERMN	40	UPPER	UC	12.07	38	25.56	26	0	26	1
6	PERMN	40	LOWER	UC	12.07	38	25.56	22	0	22	1
7	PERMN	20	UPPER	UC	4.82	31	31.11	27	0	27	1
7	PERMN	20	LOWER	UC	4.82	31	31.11	22	6	28	0.785714
7	PERMN	40	UPPER	UC	4.82	31	31.11	26	0	26	1
7	PERMN	40	LOWER	UC	4.82	31	31.11	3	23	26	0.115385
8	PERMN	20	UPPER	UC	4.02	31	31.11	24	0	24	1
8	PERMN	20	LOWER	UC	4.02	31	31.11	1	25	26	0.0384615
8	PERMN	40	UPPER	UC	4.02	31	31.11	17	9	26	0.653846
8	PERMN	40	LOWER	UC	4.02	31	31.11	0	25	25	0
9	AQUA	20	UPPER	UC	12.87	49.1	20.61	9	14	23	0.391304
9	AQUA	20	LOWER	UC	12.87	49.1	20.61	2	24	26	0.0769231
9	AQUA	40	UPPER	UC	12.87	49.1	20.61	26	0	26	1
9	AQUA	40	LOWER	UC	12.87	49.1	20.61	25	0	25	1
10	AQUA	20	UPPER	UC	12.87	49.1	20.61	26	0	26	1
10	AQUA	20	LOWER	UC	12.87	49.1	20.61	24	1	25	0.96
10	AQUA	40	UPPER	UC	12.87	49.1	20.61	24	0	24	1
10	AQUA	40	LOWER	UC	12.87	49.1	20.61	25	0	25	1
11	PERMN	20	UPPER	UC	7.4	46	22.22	23	1	24	0.958333
11	PERMN	20	LOWER	UC	7.4	46	22.22	0	25	25	0
11	PERMN	40	UPPER	UC	7.4	46	22.22	4	19	23	0.173913
11	PERMN	40	LOWER	UC	7.4	46	22.22	0	25	25	0
12	PERMN	20	UPPER	UC	6.12	46	22.22	27	0	27	1
12	PERMN	20	LOWER	UC	6.12	46	22.22	1	24	25	0.04
12	PERMN	40	UPPER	UC	6.12	46	22.22	7	18	25	0.28
12	PERMN	40	LOWER	UC	6.12	46	22.22	1	24	25	0.04

## Sheet: Upper Only (no droplet data)
REP	FORMULATION	DISTANCE	POSITION	CAGE	WIND SPEED	RH	TEMP	DEAD	ALIVE	SUM	PROPMORT
1	AQUA	20	UPPER	UC	4.02	35	27.22	22	0	22	1
1	AQUA	40	UPPER	UC	4.02	35	27.22	21	3	24	0.875
3	AQUA	20	UPPER	UC	5.63	32	30.56	19	7	26	0.730769
3	AQUA	40	UPPER	UC	5.63	32	30.56	10	15	25	0.4
4	AQUA	20	UPPER	UC	6.4	30	30	26	0	26	1
4	AQUA	40	UPPER	UC	6.4	30	30	26	0	26	1
5	PERMN	20	UPPER	UC	8.85	38	26.67	26	0	26	1
5	PERMN	40	UPPER	UC	8.85	38	26.67	25	0	25	1
6	PERMN	20	UPPER	UC	12.07	38	25.56	20	0	20	1
6	PERMN	40	UPPER	UC	12.07	38	25.56	26	0	26	1
7	PERMN	20	UPPER	UC	4.82	31	31.11	27	0	27	1
7	PERMN	40	UPPER	UC	4.82	31	31.11	26	0	26	1
8	PERMN	20	UPPER	UC	4.02	31	31.11	24	0	24	1
8	PERMN	40	UPPER	UC	4.02	31	31.11	17	9	26	0.653846
9	AQUA	20	UPPER	UC	12.87	49.1	20.61	9	14	23	0.391304
9	AQUA	40	UPPER	UC	12.87	49.1	20.61	26	0	26	1
10	AQUA	20	UPPER	UC	12.87	49.1	20.61	26	0	26	1
10	AQUA	40	UPPER	UC	12.87	49.1	20.61	24	0	24	1
11	PERMN	20	UPPER	UC	7.4	46	22.22	23	1	24	0.958333
11	PERMN	40	UPPER	UC	7.4	46	22.22	4	19	23	0.173913
12	PERMN	20	UPPER	UC	6.12	46	22.22	27	0	27	1
12	PERMN	40	UPPER	UC	6.12	46	22.22	7	18	25	0.28

## Sheet: Lower Only (no droplet data)
REP	FORMULATION	DISTANCE	POSITION	CAGE	WIND SPEED	RH	TEMP	DEAD	ALIVE	SUM	PROPMORT
1	AQUA	20	LOWER	UC	4.02	35	27.22	5	17	22	0.227273
1	AQUA	40	LOWER	UC	4.02	35	27.22	5	19	24	0.208333
3	AQUA	20	LOWER	UC	5.63	32	30.56	1	25	26	0.0384615
3	AQUA	40	LOWER	UC	5.63	32	30.56	1	25	26	0.0384615
4	AQUA	20	LOWER	UC	6.4	30	30	25	0	25	1
4	AQUA	40	LOWER	UC	6.4	30	30	6	16	22	0.272727
5	PERMN	20	LOWER	UC	8.85	38	26.67	26	0	26	1
5	PERMN	40	LOWER	UC	8.85	38	26.67	21	2	23	0.913043
6	PERMN	20	LOWER	UC	12.07	38	25.56	21	0	21	1
6	PERMN	40	LOWER	UC	12.07	38	25.56	22	0	22	1
7	PERMN	20	LOWER	UC	4.82	31	31.11	22	6	28	0.785714
7	PERMN	40	LOWER	UC	4.82	31	31.11	3	23	26	0.115385
8	PERMN	20	LOWER	UC	4.02	31	31.11	1	25	26	0.0384615
8	PERMN	40	LOWER	UC	4.02	31	31.11	0	25	25	0
9	AQUA	20	LOWER	UC	12.87	49.1	20.61	2	24	26	0.0769231
9	AQUA	40	LOWER	UC	12.87	49.1	20.61	25	0	25	1
10	AQUA	20	LOWER	UC	12.87	49.1	20.61	24	1	25	0.96
10	AQUA	40	LOWER	UC	12.87	49.1	20.61	25	0	25	1
11	PERMN	20	LOWER	UC	7.4	46	22.22	0	25	25	0
11	PERMN	40	LOWER	UC	7.4	46	22.22	0	25	25	0
12	PERMN	20	LOWER	UC	6.12	46	22.22	1	24	25	0.04
12	PERMN	40	LOWER	UC	6.12	46	22.22	1	24	25	0.04
